# Supplementary material
Source: publisher site journal article supplement (https://www.dovepress.com/article/573705)

**Supplemental Material and Methods**

**Sensitivity Analyses Based on Propensity Scores**

As a complementary strategy to the primary multivariable Cox models, we estimated a propensity score (PS) for assignment to Group E (≥1 sector‑equivalent) using baseline covariates only: BCLC stage (0/A/B), tumor burden (Up‑to‑Seven; with 5‑5‑500 prespecified as an alternative specification), tumor location (any central vs all peripheral), Child–Pugh class (A/B), age (modeled with restricted cubic splines), sex, viral etiology (HBV/HCV vs nonviral), and hyperintensity of all nodules on HBP MRI (yes/no). The PS was estimated via logistic regression (WeightIt, method = “glm”), targeting the overlap (ATO) estimand. Overlap weights were defined as 𝑤 treated = 1−PS(𝑋)wtreated =1−PS(X) and 𝑤control = PS ( 𝑋 ) wcontrol =PS(X). We then fitted weighted Cox models with robust (sandwich) variance to obtain marginal hazard ratios (HRs) for PFS and OS; for liver‑related mortality we used weighted cause‑specific Cox, treating non–liver‑related deaths as censored at the time of death. Covariate balance was evaluated using weighted standardized mean differences (SMDs) targeting < 0.10, and we reported the effective sample size (ESS), (∑𝑤)2/∑w2; variance ratios (target 0.8–1.25) were also inspected. Missingness in baseline covariates was handled by indicator coding within the PS, and balance of missingness indicators was verified. Ties in Cox models used the Efron method; two‑sided 95% CIs with α = 0.05 are reported. For visualization of marginal survival, weighted Kaplan–Meier curves were generated using survey (svykm). Primary (conditional) models were run in GraphPad Prism 10.1.1; PS‑based analyses were performed in R 4.4.2 (WeightIt, cobalt 4.6.1, survival, survey). Post‑baseline treatments (e.g., sequential RFA, whole‑liver therapy) were not included in the PS or primary Cox models to avoid adjusting for potential mediators; when relevant, they were examined only in separate sensitivity or exploratory analyses. Rationale. PS methods are presented as complementary balancing tools to probe robustness of the primary estimand, as prespecified.

**Treatment Decision Process and TACE Indications**

The HCC treatment strategy followed the BCLC guidelines and was determined by a multidisciplinary tumor board. Superselective cTACE (ss-cTACE) was preferred over surgery or RFA in cases with technically challenging lesion locations. When necessary, sequential RFA or split ss-cTACE was performed. For disease progression beyond BCLC stage C, systemic therapy or combined intra-arterial and pharmacological therapies were initiated.

**Image Evaluation and Interobserver Reliability**

Two interventional radiologists with over 15 and 23 years of experience in hepatic interventional oncology, respectively, evaluated the embolization extent and procedural images. All procedures were reviewed jointly, and for each case the final sector-equivalent category (Group L <1 sector-equivalent vs Group E ≥1 sector-equivalent) was assigned in real time by consensus at the end of the procedure. To explore the reproducibility of this sector-equivalent classification, we additionally compared the category recorded in the original procedural reports with an independent post-hoc classification in a subset of patients based on post-procedural angiographic and CTHA/CT images. Agreement for Group L versus Group E was almost perfect, with a Cohen’s κ of 0.81 (95% CI 0.63–0.99). Disagreements were resolved by consensus.

**Subsegmental Lipiodol-cTACE Procedure**

Multiphase imaging and CTHA were performed to confirm HCC. Tumor‑feeding arteries were identified using multiplanar reconstructions and matched with DSA findings. A 1.5–1.7‑F microcatheter was then advanced as distally as possible into subsegmental or more peripheral branches to achieve superselective access while minimizing embolization of non‑tumorous parenchyma.

For each tumor feeder, a water‑in‑oil emulsion of epirubicin and iodized oil was prepared. Epirubicin (10–30 mg; Farmorbicin, Pfizer, Tokyo, Japan) was dissolved in contrast medium and mixed with 2–8 mL of iodized oil at a fixed volume ratio of 1:2 (chemotherapeutic solution:iodized oil). The total amount of iodized oil was determined according to tumor size and was approximately equal to the sum of the diameters of all target tumors. When a tumor was supplied by multiple feeders, the emulsion volume was divided and injected into each feeder in proportion to the tumor volume supplied by that branch. The emulsion was slowly injected under fluoroscopy until either the flow in the tumor feeder stalled or the portal veins near the tumor were clearly opacified with iodized oil.

After the iodized‑oil emulsion injection, embolization was completed using a gelatin sponge (GS) slurry. The slurry was created from 1‑mm‑diameter GS particles (Gelpart; Nippon Kayaku, Tokyo, Japan) that were crushed into approximately 0.2–0.5 mm fragments by repeatedly pumping between two 2.5‑mL syringes connected via a three‑way stopcock or a dedicated medication‑mixing connector (MicoMagic; PIOLAX MEDICAL DEVICES, Kanagawa, Japan). The GS slurry was injected through the microcatheter until complete angiographic occlusion of the tumor feeder was achieved.

The endpoint of the TACE procedure was defined as disappearance of all tumor stains and angiographic occlusion of all identified tumor feeders on DSA. At the end of each procedure, a non‑contrast CT scan of the liver (lipiodol CT, LipCT) was routinely obtained to evaluate lipiodol deposition and confirm that the embolized territory corresponded to the planned target area. When LipCT revealed incomplete embolization of the tumor and additional tumor feeder(s) could be identified on DSA and/or CT angiography, additional ss‑cTACE was performed in the same session.

**Follow-Up Protocol**

CT or MRI was performed every 3–6 months post-procedure to evaluate for recurrence, along with serum tumor marker assessment.

**Systemic Chemotherapy and Whole-Liver Therapy**

Whole-liver therapies included low-dose FP and cisplatin-based regimens. Systemic treatments included sorafenib, lenvatinib, regorafenib, atezolizumab, and bevacizumab, selected according to tumor characteristics and patient condition.

**CTHA Protocol and Imaging System**

CTHA was performed using a Toshiba Aquilion 64 or Canon Aquilion ONE Vision system depending on the year. Both were used with an Infinix Celeve angiography unit. Scan parameters and contrast timing are detailed in the imaging protocols.

**Prognostic Factors and Tumor Classification**

Clinical and imaging-based prognostic factors included Child–Pugh score, ALBI score, HBP signal intensity, BCLC stage, 5-5-500 and up-to-seven criteria, tumor location (central/peripheral), and hyperintensity on hepatobiliary-phase MRI.

**Gadoxetic Acid–Enhanced MRI Protocol**

MR images were acquired using 1.5- or 3.0-T systems. Signal intensity ratios were calculated from ROIs placed on liver and tumor tissue during the hepatobiliary phase after injection of gadoxetic acid. Hyperintensity was defined as a signal increase exceeding that of background liver.

**Definitions: 5-5-500 rule and Up-to-Seven Criteria**

- - 1. rule: Tumor size ≤5 cm, ≤5 nodules, AFP ≤500 ng/mL.

Up-to-seven criteria: Sum of tumor number and size ≤7.

**Cause-Specific Hazard Model**

Liver-related death was modeled as event_type = 1, non–liver-related death as event_type = 2, and censored observations as event_type = 0. Only event_type = 1 was treated as the endpoint in the cause-specific Cox model, with event_type = 2 censored at the time of occurrence.

**Supplemental Table and Figures**

**Table S1 Collinearity Assessment of Liver Function Markers**

| **Variable** | **VIF** | **R2 with other variables** |
| --- | --- | --- |
| **Serum albumin level** | 1660 | 0.9994 |
| **Serum bilirubin level** | 30.19 | 0.9669 |
| **ALBI score** | 1214 | 0.9992 |
| **Child–Pugh B** | 1.928 | 0.4813 |
| **HBP signal intensity ratio of the liver** | 20.10 | 0.9503 |

**Note:** The Child–Pugh classification was selected as the representative variable for liver reserve func-tion in the multivariate analysis. This decision was based on its variance inflation factor (VIF) being < 10, indicating a lower multicollinearity risk among the identified significant variables. The serum albumin level, serum bilirubin level, albumin-bilirubin score, and background uptake all had VIF values > 10.

**Table S2 Comparative Univariable and Multivariable p-Values for PFS and OS**

| **Variables** | **Progression-Free Survival** | | **Over all survival** | |
| --- | --- | --- | --- | --- |
| **Univariable**  ***p*-value** | **Multivariable**  ***p*-value** | **Univariable**  ***p*-value** | **Multivariable**  ***p*-value** |
| **Female Sex** | .05 |  | .87 |  |
| **Age** | .16 |  | .29 |  |
| **Hepatitis B or C** | .07 |  | .61 |  |
| **Child–Pugh classification B** | .52 |  | .01 | .01 |
| **BCLC A (ref. 0)** | .02 | .08 | .91 |  |
| **BCLC B (ref. 0)** | < .001 | .003 | .10 |  |
| **Up to seven beyond** | < .001 | .77 | < .001 | .03 |
| **5-5-500 beyond** | .01 | .78 | < .001 | .78 |
| **Serum Alb level** | .40 |  | < .001 |  |
| **Serum Bil level** | .57 |  | .04 |  |
| **ALBI score** | .56 |  | < .001 |  |
| **Serum AFP level** | .19 |  | .15 |  |
| **Serum PIVKA-II level** | .55 |  | < .001 | .004 |
| **HBP signal intensity ratio of the liver** | .66 |  | .005 |  |
| **HBP high signal intensity of all nodules** | .02 | .14 | .02 | .045 |
| **Any HCCs in central zone** | .006 | .15 | .05 |  |
| **Group E (ref. Group L)** | < .001 | .01 | < .001 | .004 |
| **Split ss-cTACE** | .001 | .47 | .006 | .13 |
| **Non-application of RFA following ss-cTACE** | .048 | .34 | N.A. |  |
| **Combination ss-cTACE and RFA** | N.A. |  | .005 | .32 |
| **Observation of Untreated lesion** | .38 |  | .80 |  |
| **Molecular target therapy** | N.A. |  | .21 |  |
| **Whole-liver therapy** | N.A. |  | .03 | .05 |

**Note:** This table compares univariable and multivariable analysis results for progression-free survival and overall survival in patients treated with ss-cTACE. Variables include clinical factors, tumor characteristics, and treatment modalities. Data are derived from Cox proportional hazards models in Figures 4 and 5, highlighting statistically significant predictors of survival.

**Table S3 Baseline covariate balance before vs after overlap weighting**

|  | **Type** | **SMD (Unweig hted)** | **V.Ratio.Un** | **SMD (Weighted)** | **Variance Ratio (Weighted)** | **V.Threshold** |
| --- | --- | --- | --- | --- | --- | --- |
| **Propensity score** | Distance | 1.074 | 1.523 | .029 | 1.21 | Balanced, <2 |
| **BCLC 0** | Binary | -0.128 | NA | 0 | NA |  |
| **BCLC A** | Binary | -0.056 | NA | 0 | NA |  |
| **BCLC B** | Binary | 0.184 | NA | 0 | NA |  |
| **Up to7 beyond** | Binary | 0.235 | NA | 0 | NA |  |
| **Central** | Binary | 0.264 | NA | 0 | NA |  |
| **child_pugh_B** | Binary | 0.046 | NA | 0 | NA |  |
| **child_pugh:<NA>** | Binary | -0.032 | NA | 0 | NA |  |
| **ns(age, 3)1** | Contin. | -0.031 | 1.097 | 0 | 1.02 | Balanced, <2 |
| **ns(age, 3)2** | Contin. | 0.048 | 0.951 | 0 | 1.09 | Balanced, <2 |
| **ns(age, 3)3** | Contin. | 0.033 | 1.283 | 0 | 1.12 | Balanced, <2 |
| **Sex M** | Binary | 0.181 | NA | 0 | NA |  |
| **Viral** | Binary | 0.058 | NA | 0 | NA |  |
| **HBP all high** | Binary | -0.079 | NA | 0 | NA |  |

**Note:** Standardized mean differences and variance ratios for each covariate; effective sample size (ESS) reported. Age was entered as restricted/natural cubic spline (df = 3); therefore, three spline basis terms (ns(age,3)1–3) appear.

**Supplemental Result**

Propensity score sensitivity analyses. Overlap weighting achieved excellent balance (all weighted SMDs < 0.10) with ESS/N = 0.68 (Control ≈ 92.3; Treated ≈ 52.0) (Figure S2; Table S1). The marginal HRs (Group E vs L) were 1.53 (95% CI 1.00–2.34) for PFS and 1.73 (95% CI 1.02–2.92) for OS; for liver related death, the weighted cause specific HR was 2.22 (95% CI 1.18–4.16). These were directionally consistent with the primary multivariable Cox estimates. E values for the CI bound closest to the null were 1.07 (PFS), 1.17 (OS), and 1.65 (liver related death), indicating moderate robustness to unmeasured confounding for liver related mortality, whereas PFS/OS were more sensitive.

**Supplemental Figures**

**Figure S1 Postprocedural plain CT from the same patient depicted in Figure 3, confirming localized lipiodol deposition strictly within the limited embolization area (<1 sector-equivalent).**

**
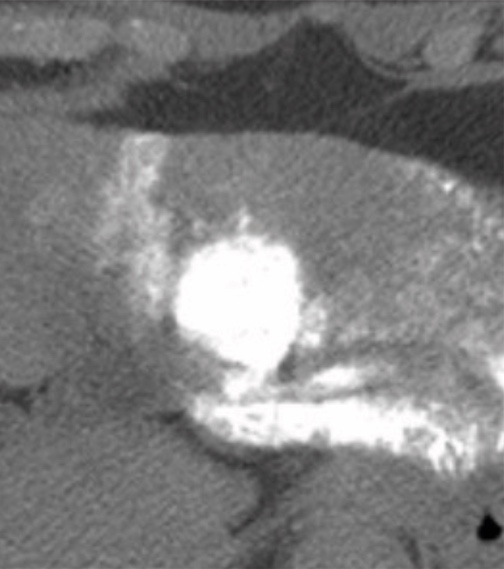
**

**Figure S2. Covariate balance after overlap weighting.**
Love plot showing absolute standardized mean differences (SMDs) for baseline covariates comparing the treated and control groups before weighting (unweighted; pink) and after overlap weighting (weighted; green). The vertical dashed line at SMD = 0.10 indicates the pre‑specified threshold for acceptable covariate balance.


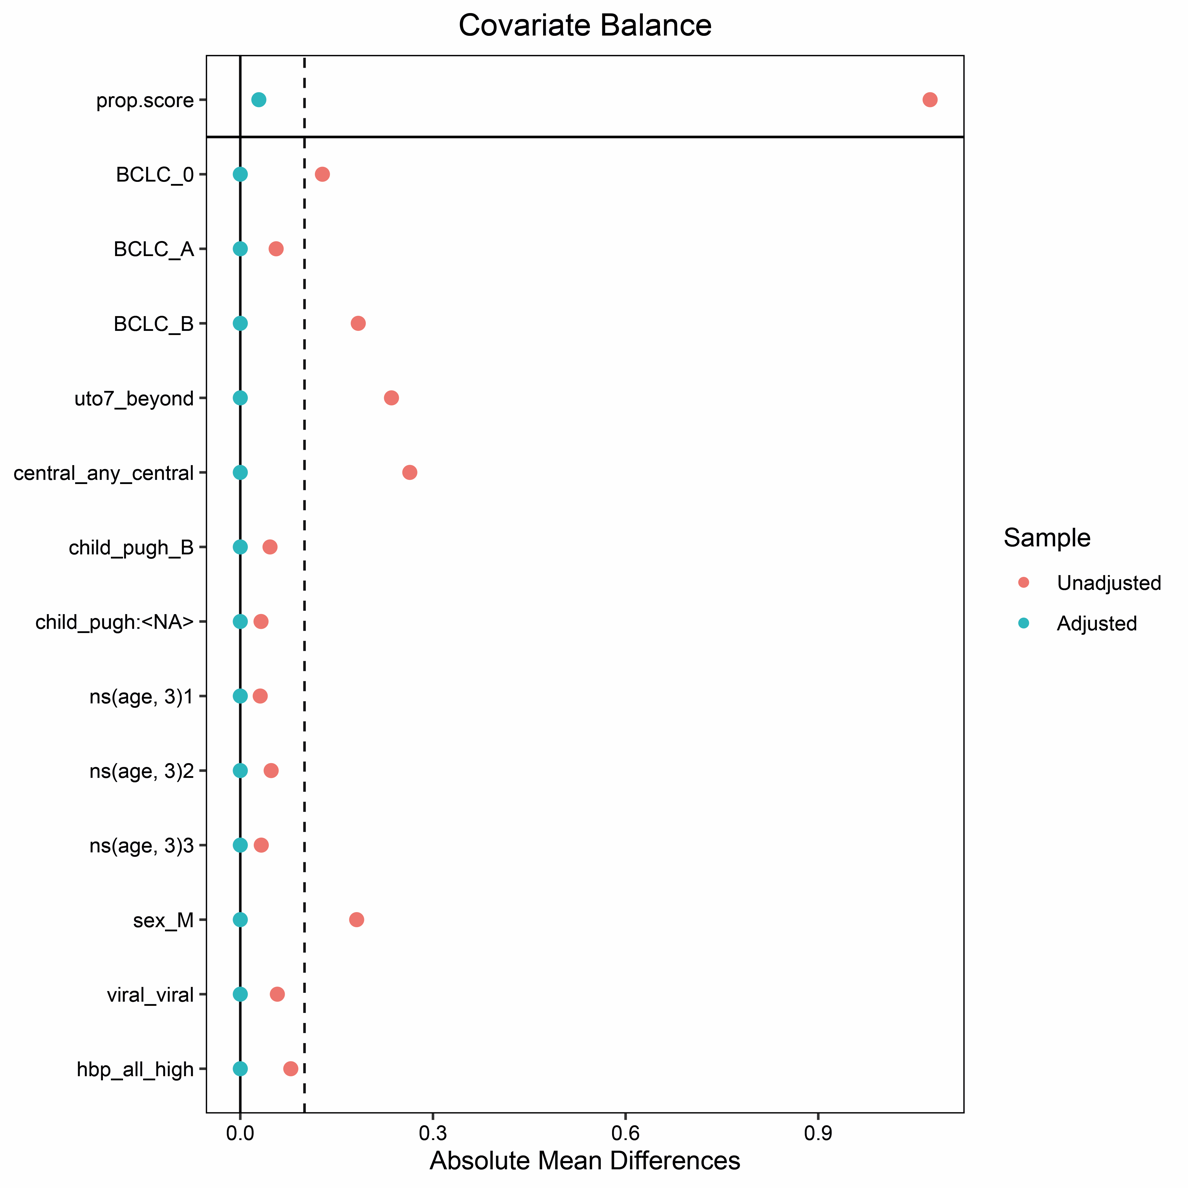


**Figure S3. Overlap‑weighted survival curves.**
Kaplan–Meier survival curves in the overlap‑weighted pseudo‑population comparing treated and control groups. The y‑axis shows survival probability and the x‑axis shows follow‑up time (months).


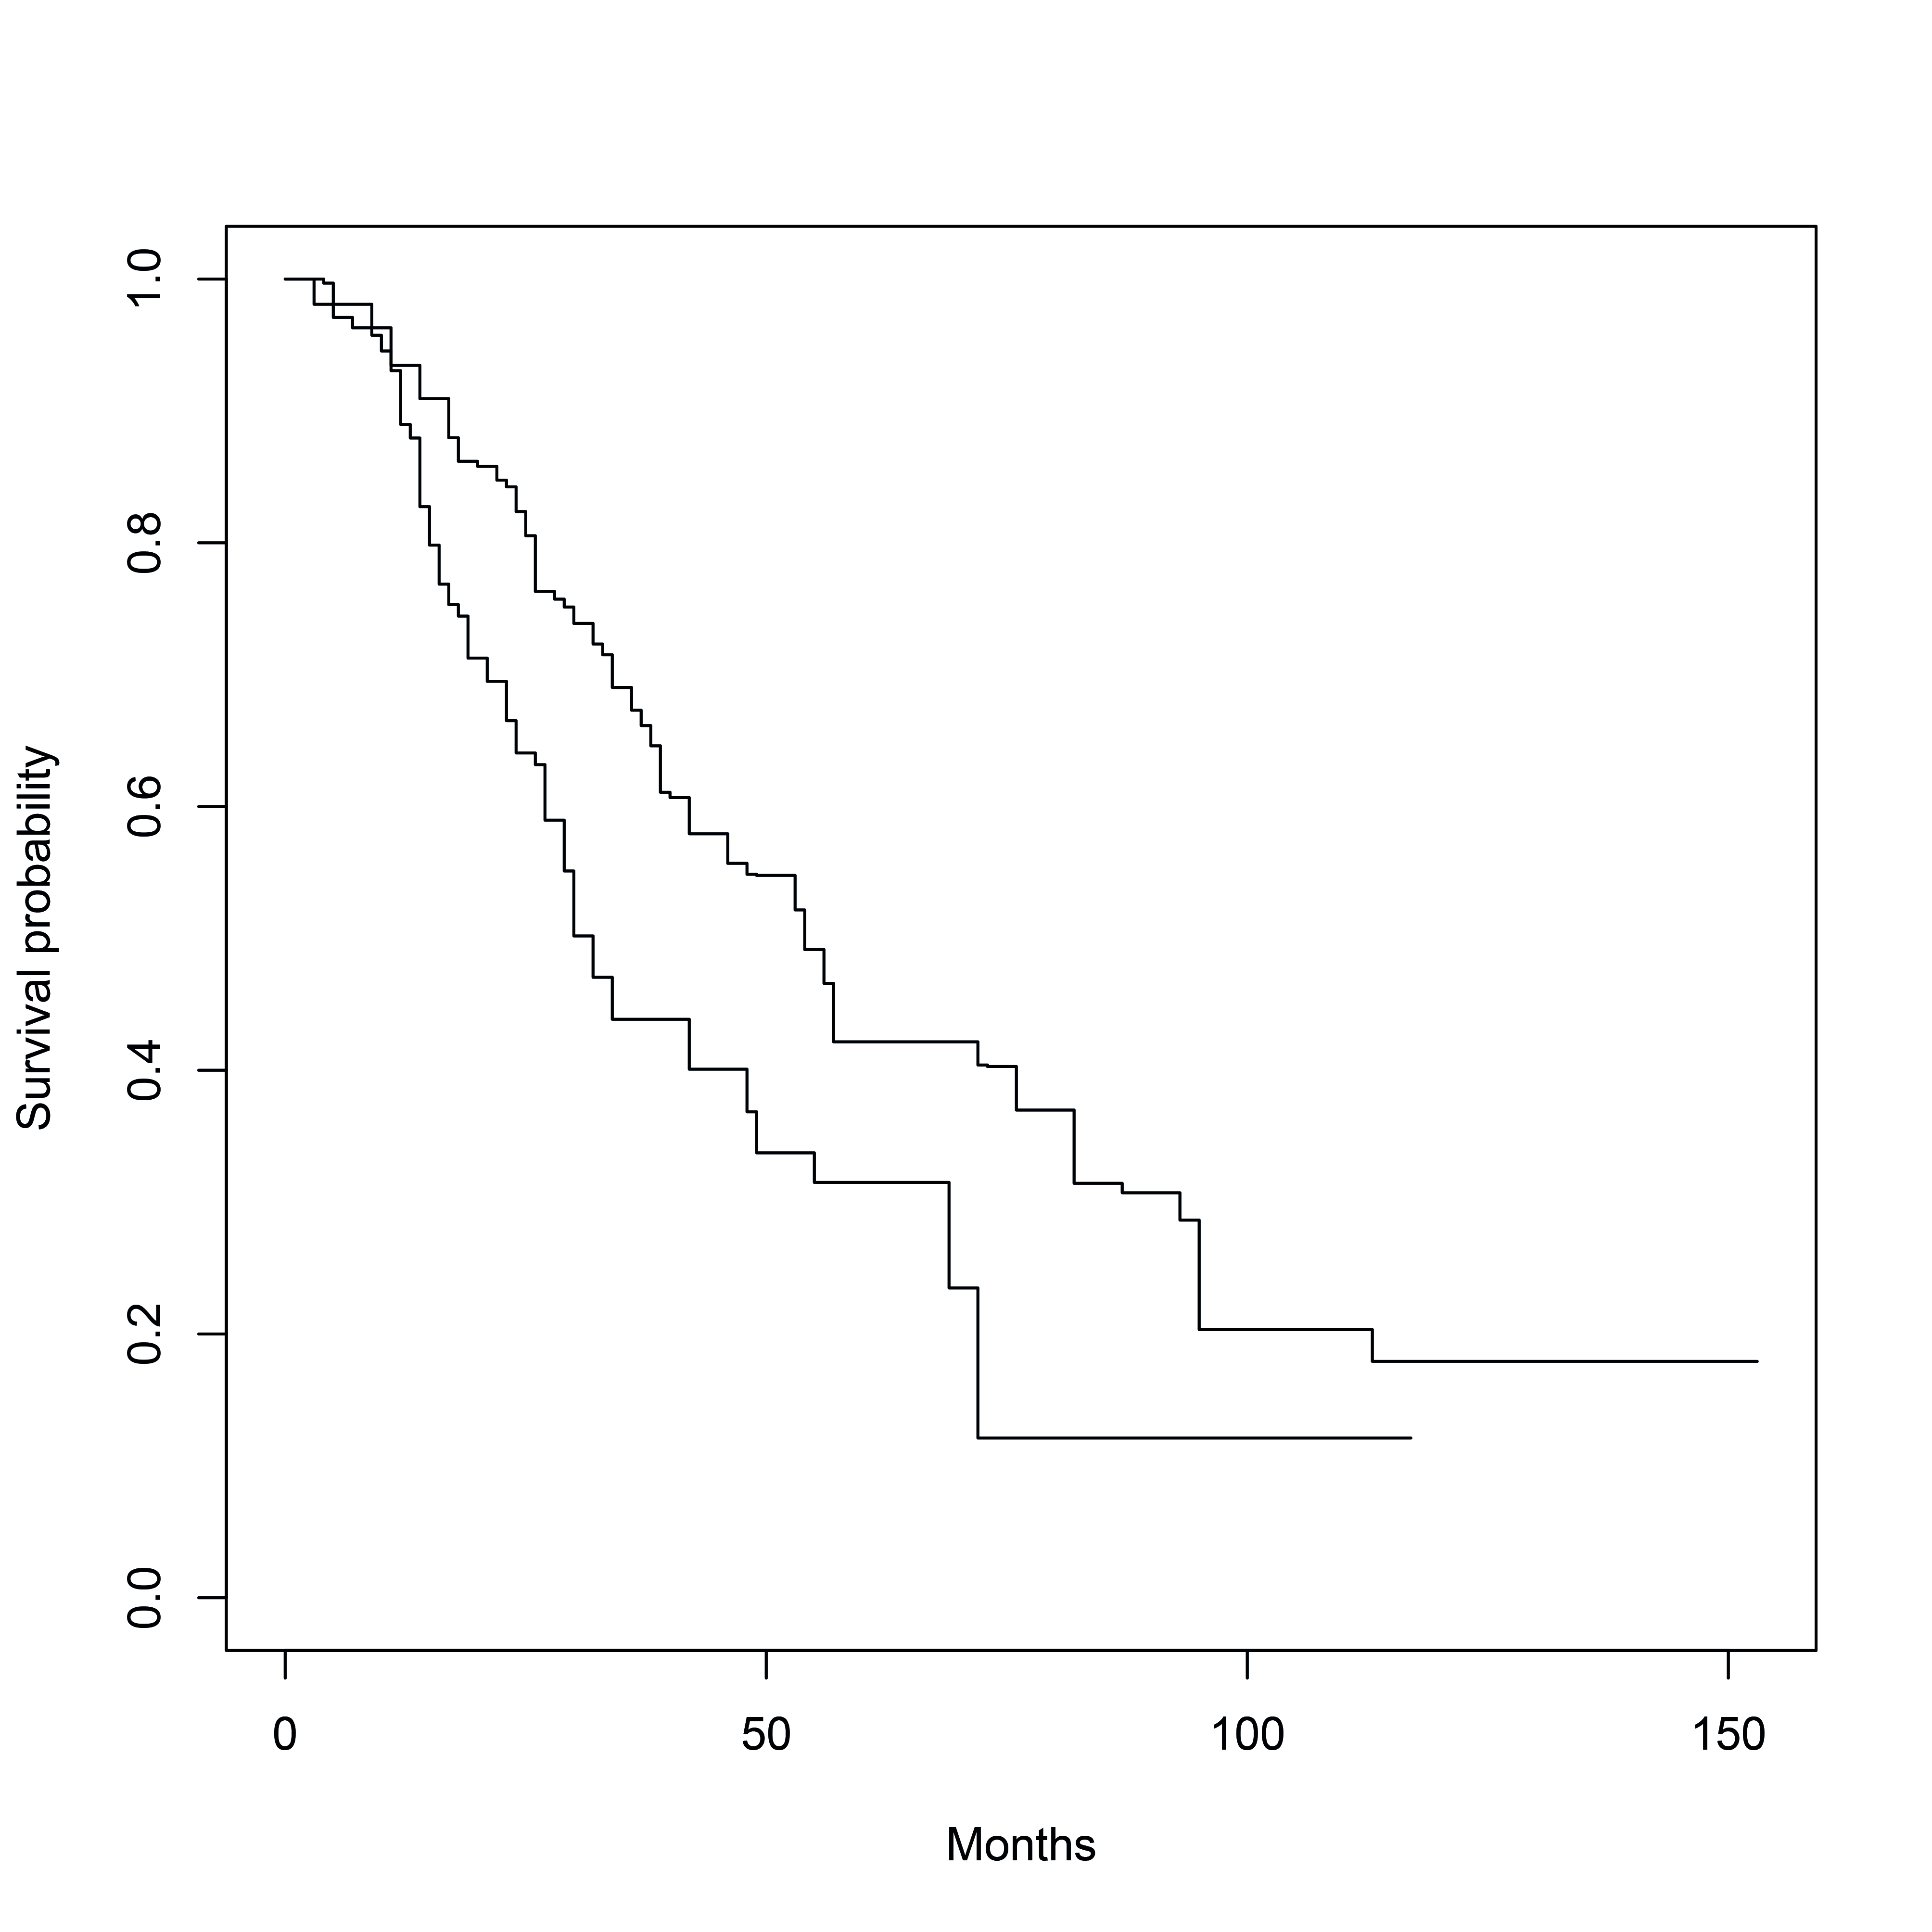

Supplement: Supplementary file 1 [file Supplmental%20revised.docx]
